# Supplementary material
Source: PubMed Central journal article supplement (PMC6867857)
Supplement: IAI.00482-19-s0001.pdf [file IAI.00482-19-s0001.pdf]

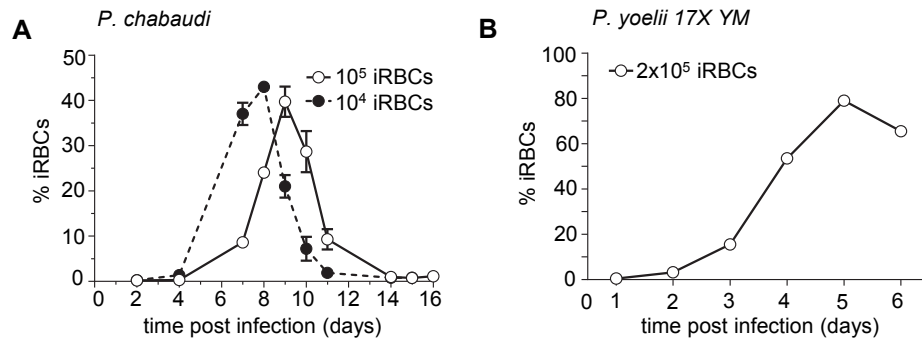

**Figure S1: Kinetics of blood parasitemia after *P. chabaudi* or *Py* YM infection.** WT B6 mice were inoculated with iRBCs from indicated murine *Plasmodium* strain (*P. yoelii* 17X YM, *P. chabaudi*) and at indicated times, 1  $\mu$ L of blood was harvested (tail vein), fixed and stained with YOYO-1 to detect parasite nucleic acids inside RBCs using flow cytometry.
