# Supplementary material
Source: PubMed Central journal article supplement (PMC6867857)
Supplement: IAI.00482-19-s0002.pdf [file IAI.00482-19-s0002.pdf]

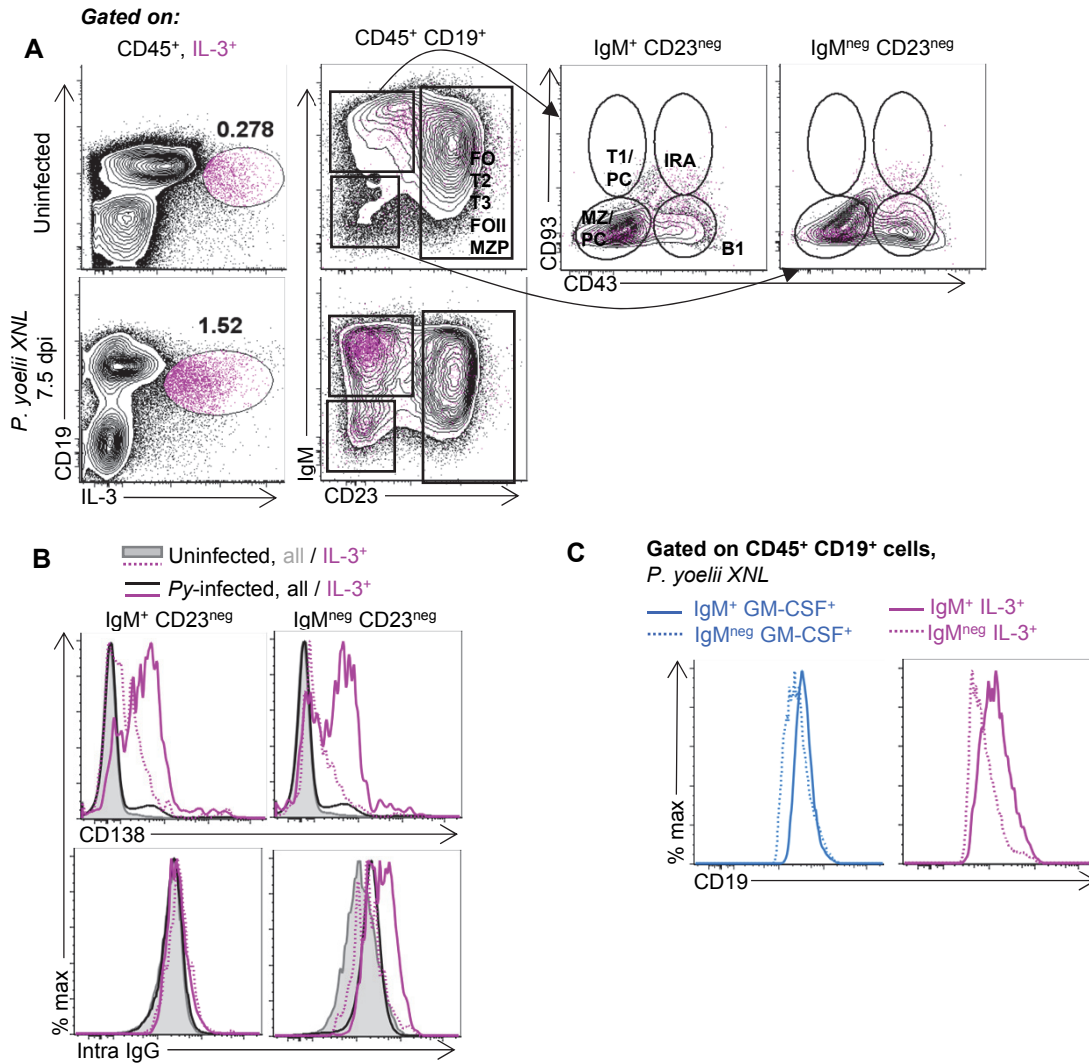

**Figure S2: IL-3<sup>+</sup> B cell phenotypes:** WT B6 mice were inoculated with *P. yoelii* 17XNL iRBCs or injected with the same numbers of uninfected RBCs (Uninfected). (A) Spleens from uninfected or day 7.5 *Py*-infected mice were harvested and cells stained for cell-surface CD45, CD19, IgM, CD23, CD43, CD93, CD5 and intracellular GM-CSF or IL-3. Dot plots are shown with the successive gating strategy used. IL-3<sup>+</sup> (fuchsia) cells are overlaid on indicated populations. (B) Spleen cells from uninfected or day 7.5 *Py*-infected mice were stained for cell-surface CD45, CD19, IgM, CD23, CD138 and intracellular IL-3 and IgG. (C) Levels of CD19 on IgM<sup>+</sup> versus IgM<sup>neg</sup> GM-CSF<sup>+</sup> and IL-3<sup>+</sup> cells from the spleen of day 7.5 *Py*-infected mice. In all experiments, representative FACS dot plots of 1 mouse across 3 replicate experiments are shown (n=3-8 mice).
