# Supplementary material
Source: PubMed Central journal article supplement (PMC6867857)
Supplement: IAI.00482-19-s0003.pdf [file IAI.00482-19-s0003.pdf]

| Reagent/Antibody                              | Fluorochrome                           | Clone     | Purchased from                |
|-----------------------------------------------|----------------------------------------|-----------|-------------------------------|
| <b>FACS</b>                                   |                                        |           |                               |
| anti-B220                                     | FITC, PE-Cy7                           | RA3-6B2   | BD Biosciences                |
| anti-Blimp-1                                  | APC                                    | 5E7       | Biolegend                     |
| anti-CD138                                    | PE, biotin                             | 281-2     | BD Biosciences                |
| anti-CD19                                     | BV510, PerCP.Cy5.5                     | 1D3       | BD Biosciences                |
| anti-CD23                                     | PE-Cy7                                 | B3B4      | eBioscience                   |
| anti-CD43                                     | PE, PE-Cy7, biotin                     | S7        | BD Biosciences                |
| anti-CD45                                     | Alexa 700                              | 30F11     | eBioscience                   |
| anti-CD45.1                                   | FITC, PE, Pacific Blue                 | A20       | eBioscience                   |
| anti-CD45.2                                   | Alexa 700, PE, APC                     | 104       | eBioscience                   |
| anti-CD5                                      | APC                                    | 53-7.3    | Biolegend                     |
| anti-CD93                                     | FITC, PE, biotin                       | AA4.1     | eBioscience                   |
| anti-GM-CSF                                   | PE                                     | MP1-22E9  | eBioscience                   |
| anti-IgD                                      | eFluor450, PerCP.Cy5.5                 | 11-26     | eBioscience or BD Biosciences |
| anti-IgG                                      | PE-Texas Red                           | Poly4053  | Biolegend                     |
| anti-IgM                                      | APC, Pacific Blue                      | 11-41     | eBioscience or BD Biosciences |
| anti-IL3                                      | PE                                     | MP2-8F8   | BD Biosciences                |
| streptavidin                                  | PE, APC, Pacific Blue, Alexa 700, FITC |           | eBioscience                   |
| <b>Ex vivo depletion (negative selection)</b> |                                        |           |                               |
| anti-CD4                                      |                                        | GK1.5     | eBioscience                   |
| anti-IgD                                      |                                        | 11-26c.2a | BD Biosciences                |
| anti-CD11b                                    |                                        | M1/70     | eBioscience                   |
| anti-CD8 $\beta$                              |                                        | H35       | eBioscience                   |
| anti-Ter119                                   |                                        | Ter119    | eBioscience                   |

**Table S1**
